# Supplementary material for: HDAC7 promotes NSCLC proliferation and metastasis via stabilization by deubiquitinase USP10 and activation of β-catenin-FGF18 pathway
Source: PubMed Central journal article supplement (PMC8915541; doi:10.1186/s13046-022-02266-9), 2022-03-11

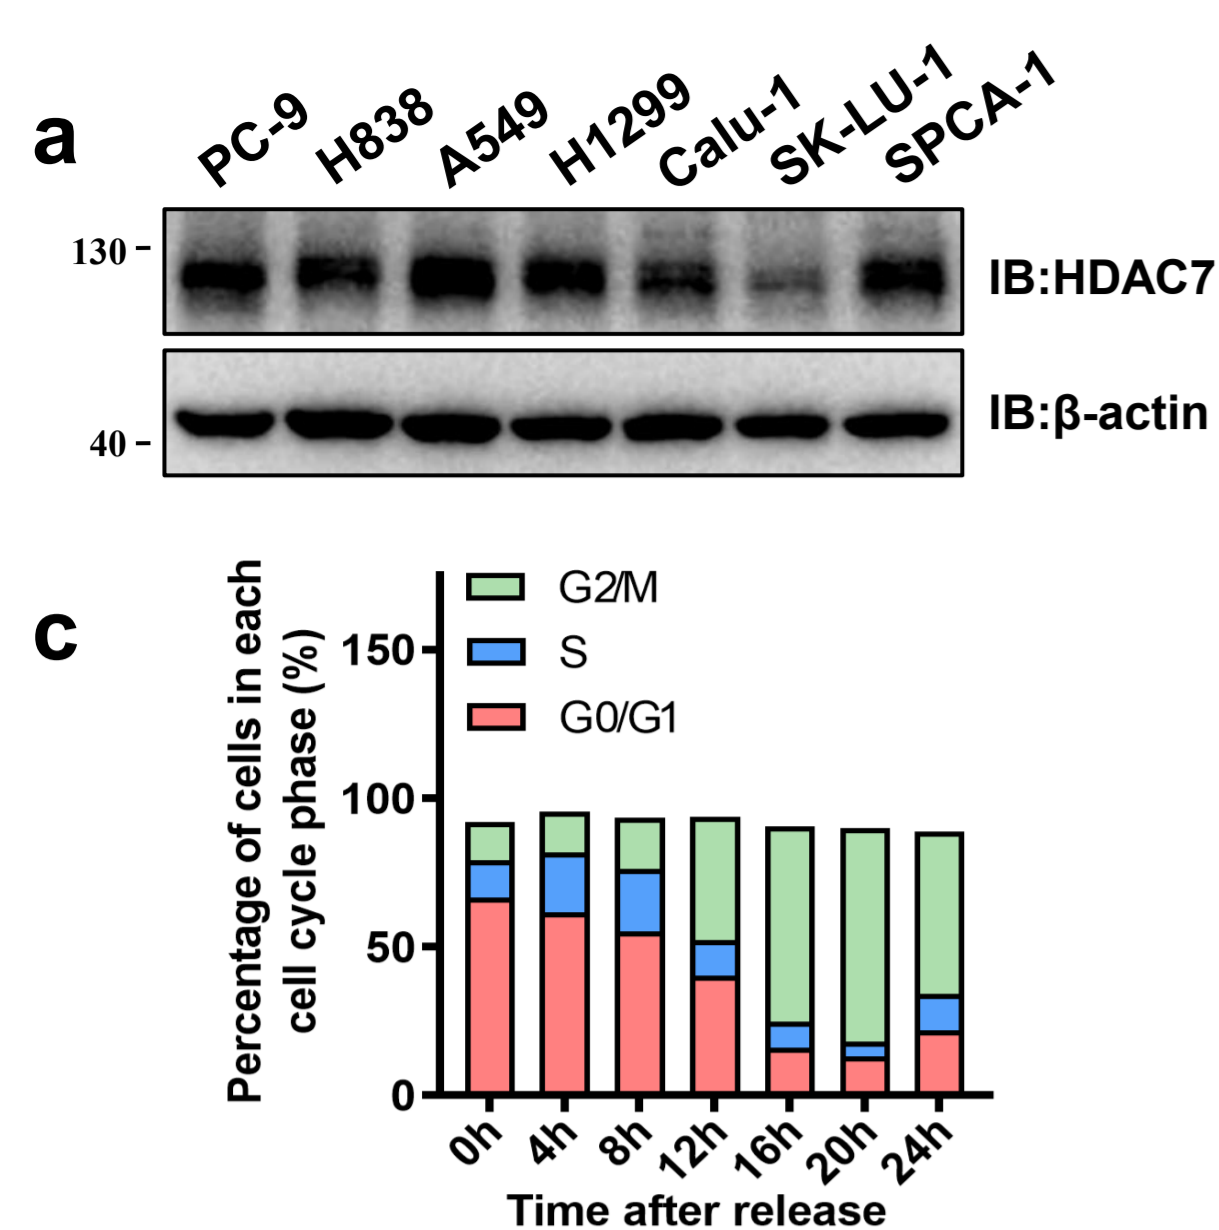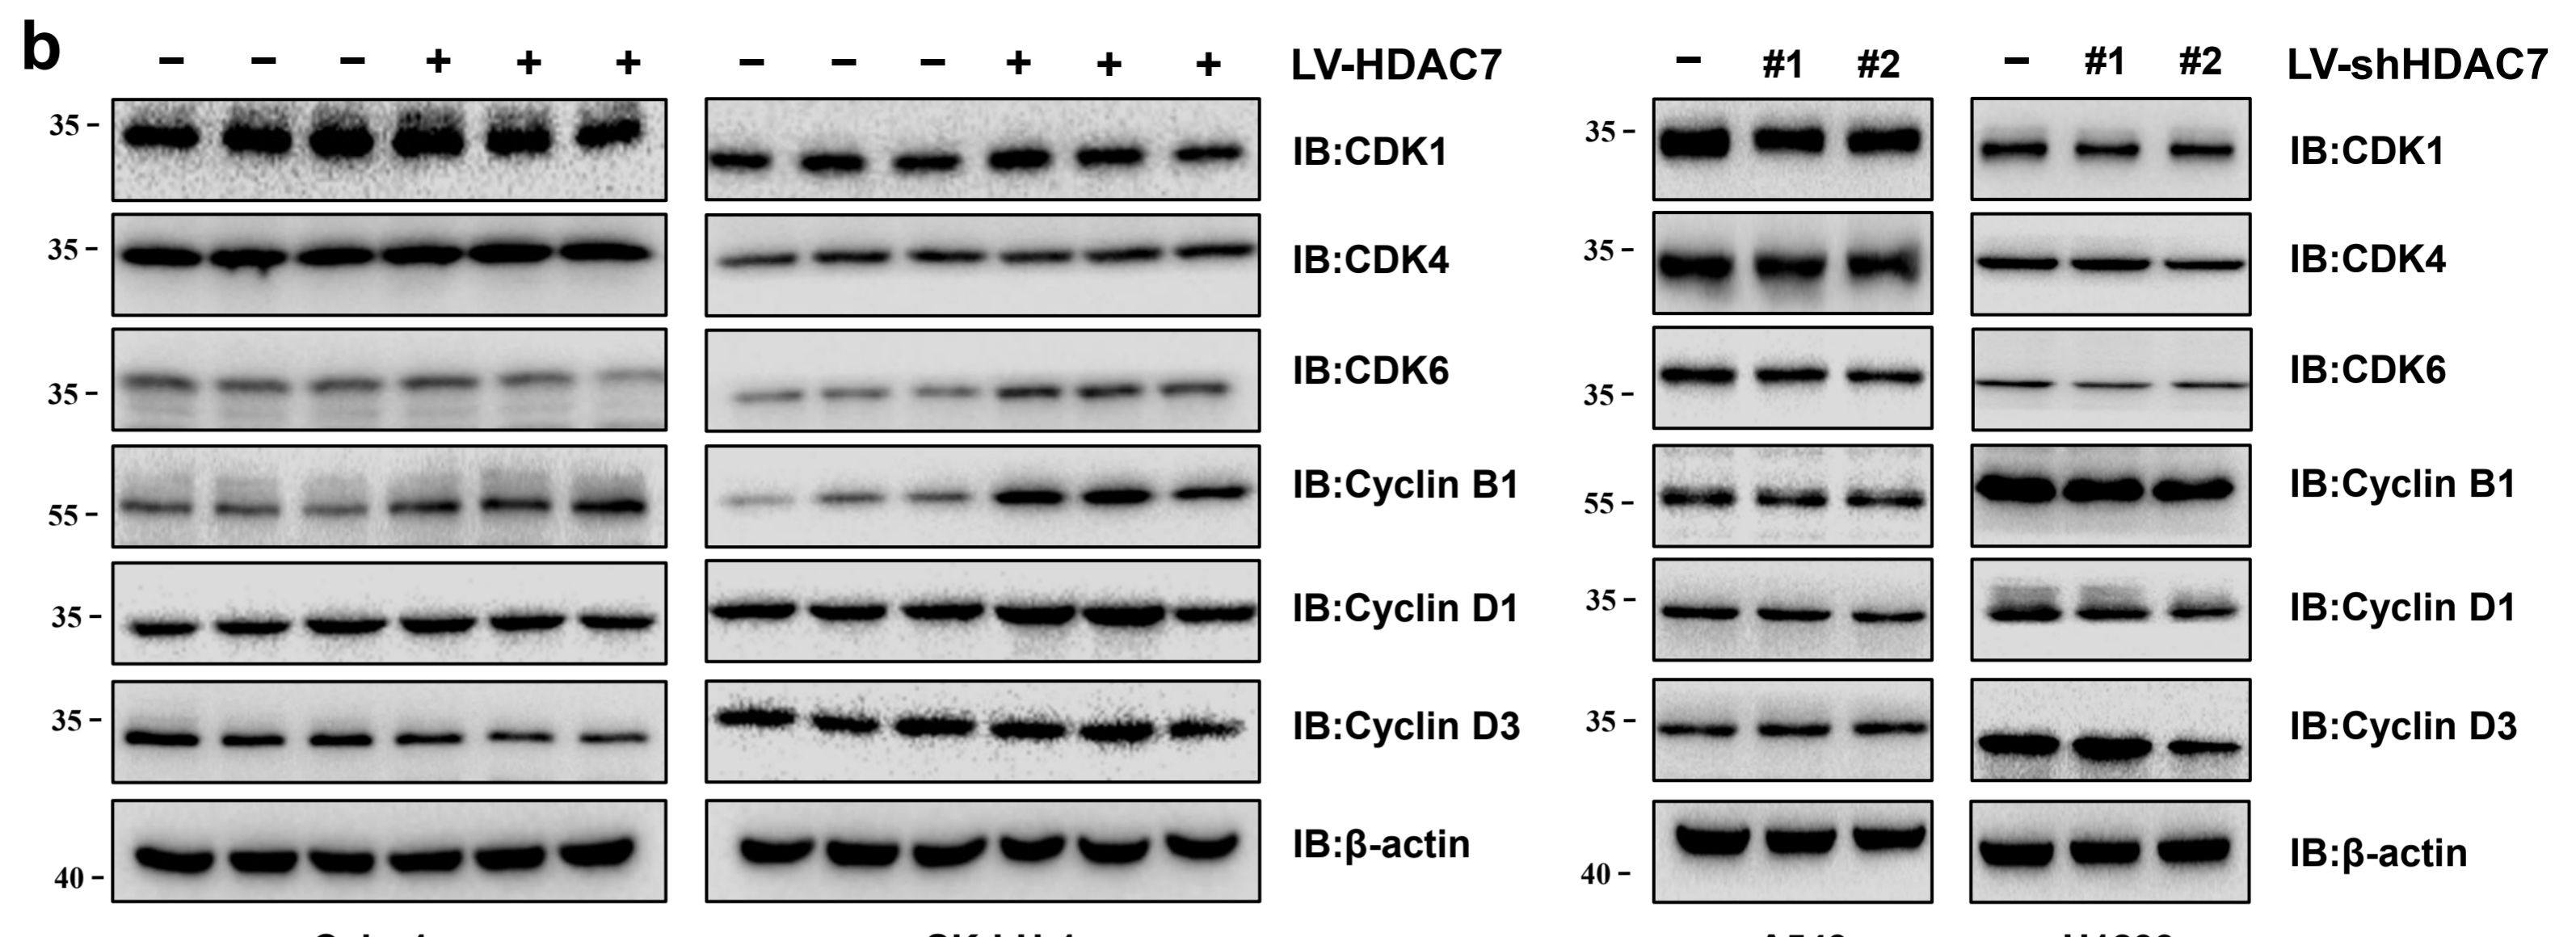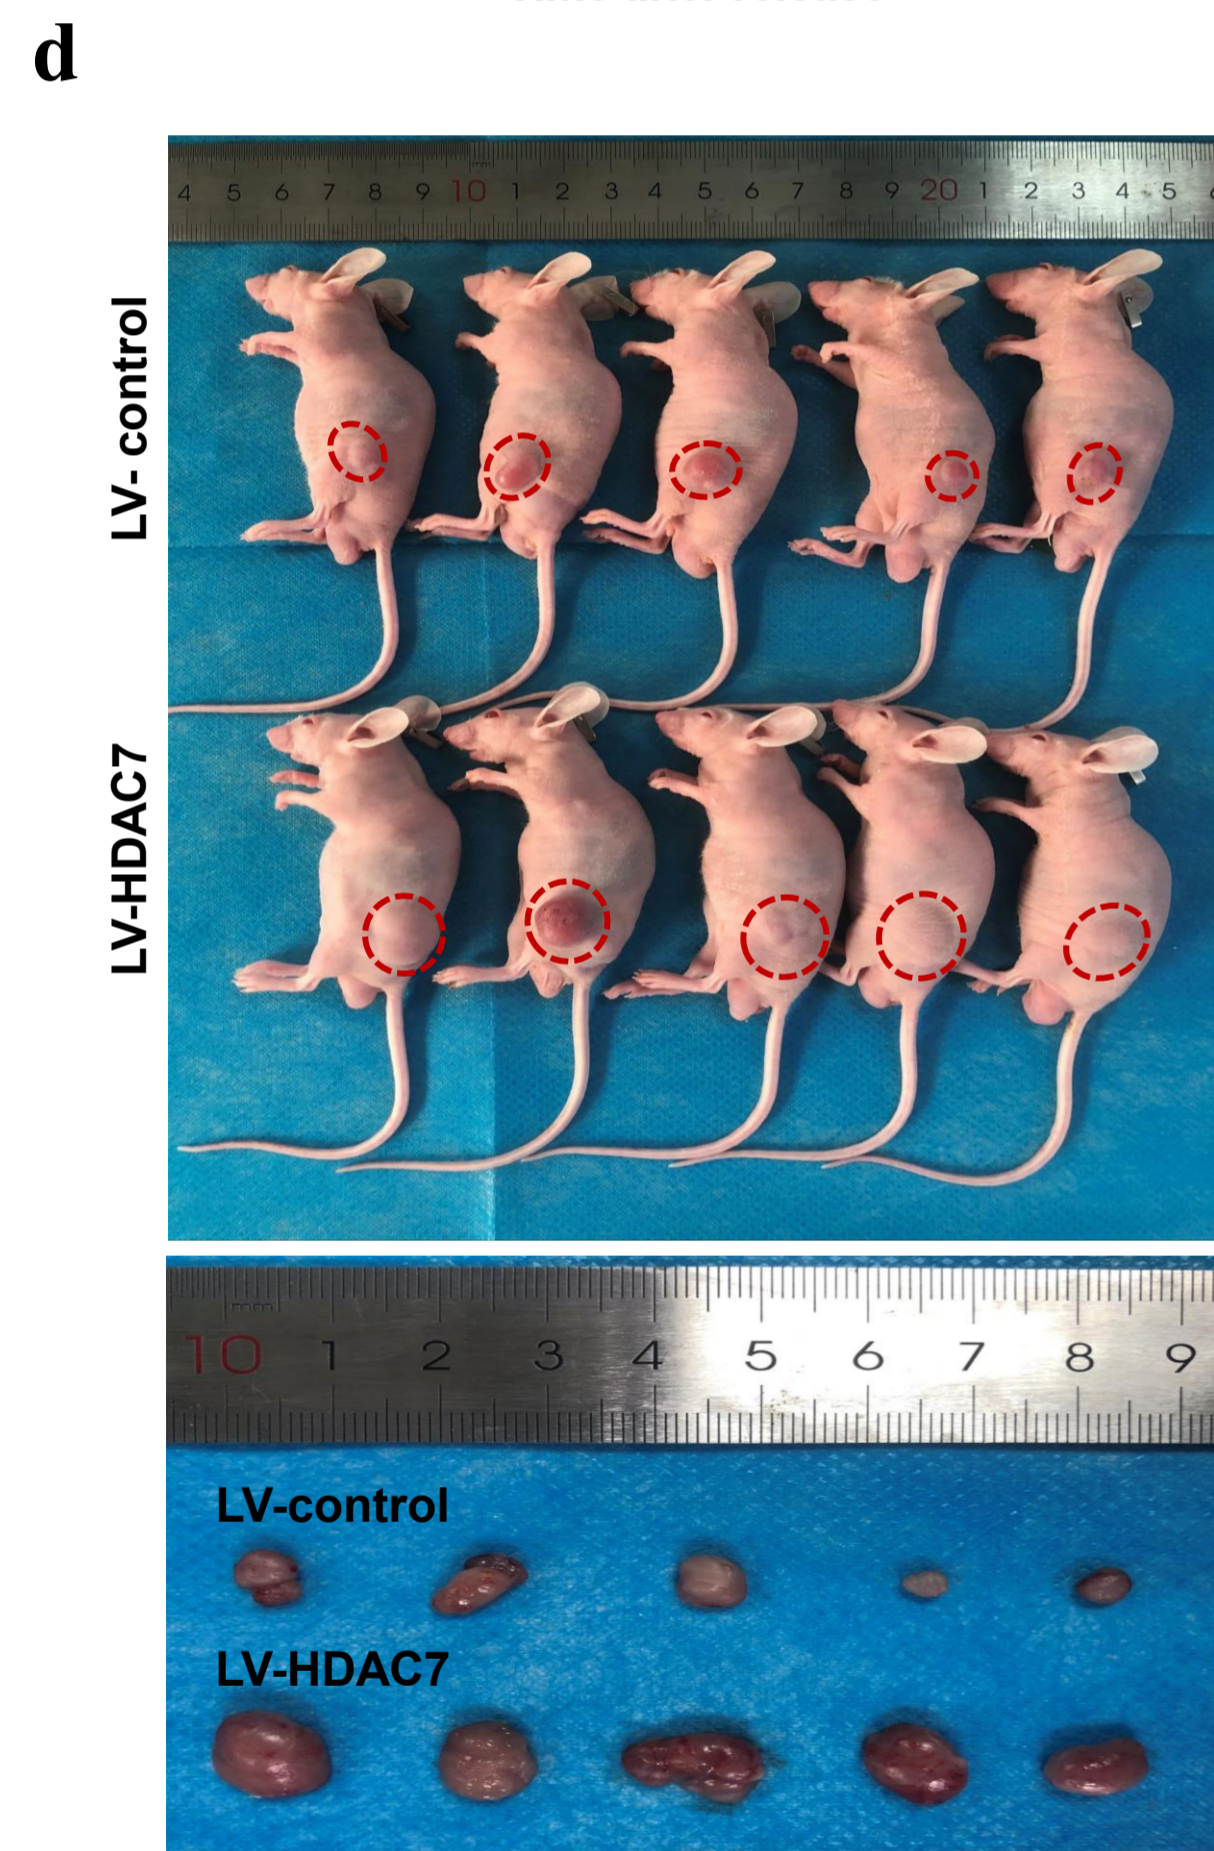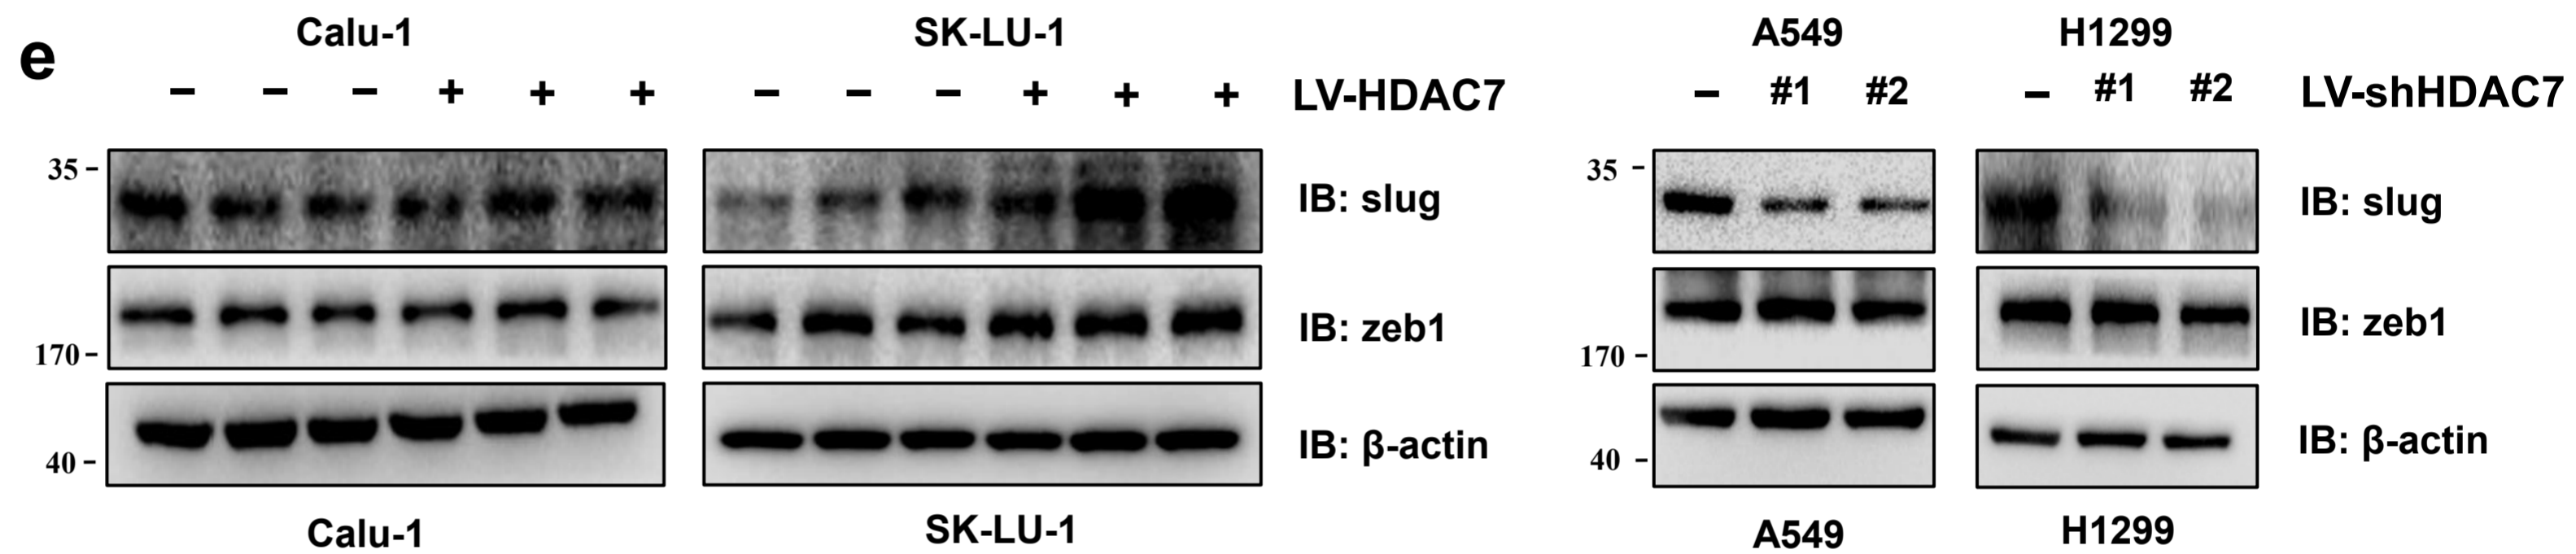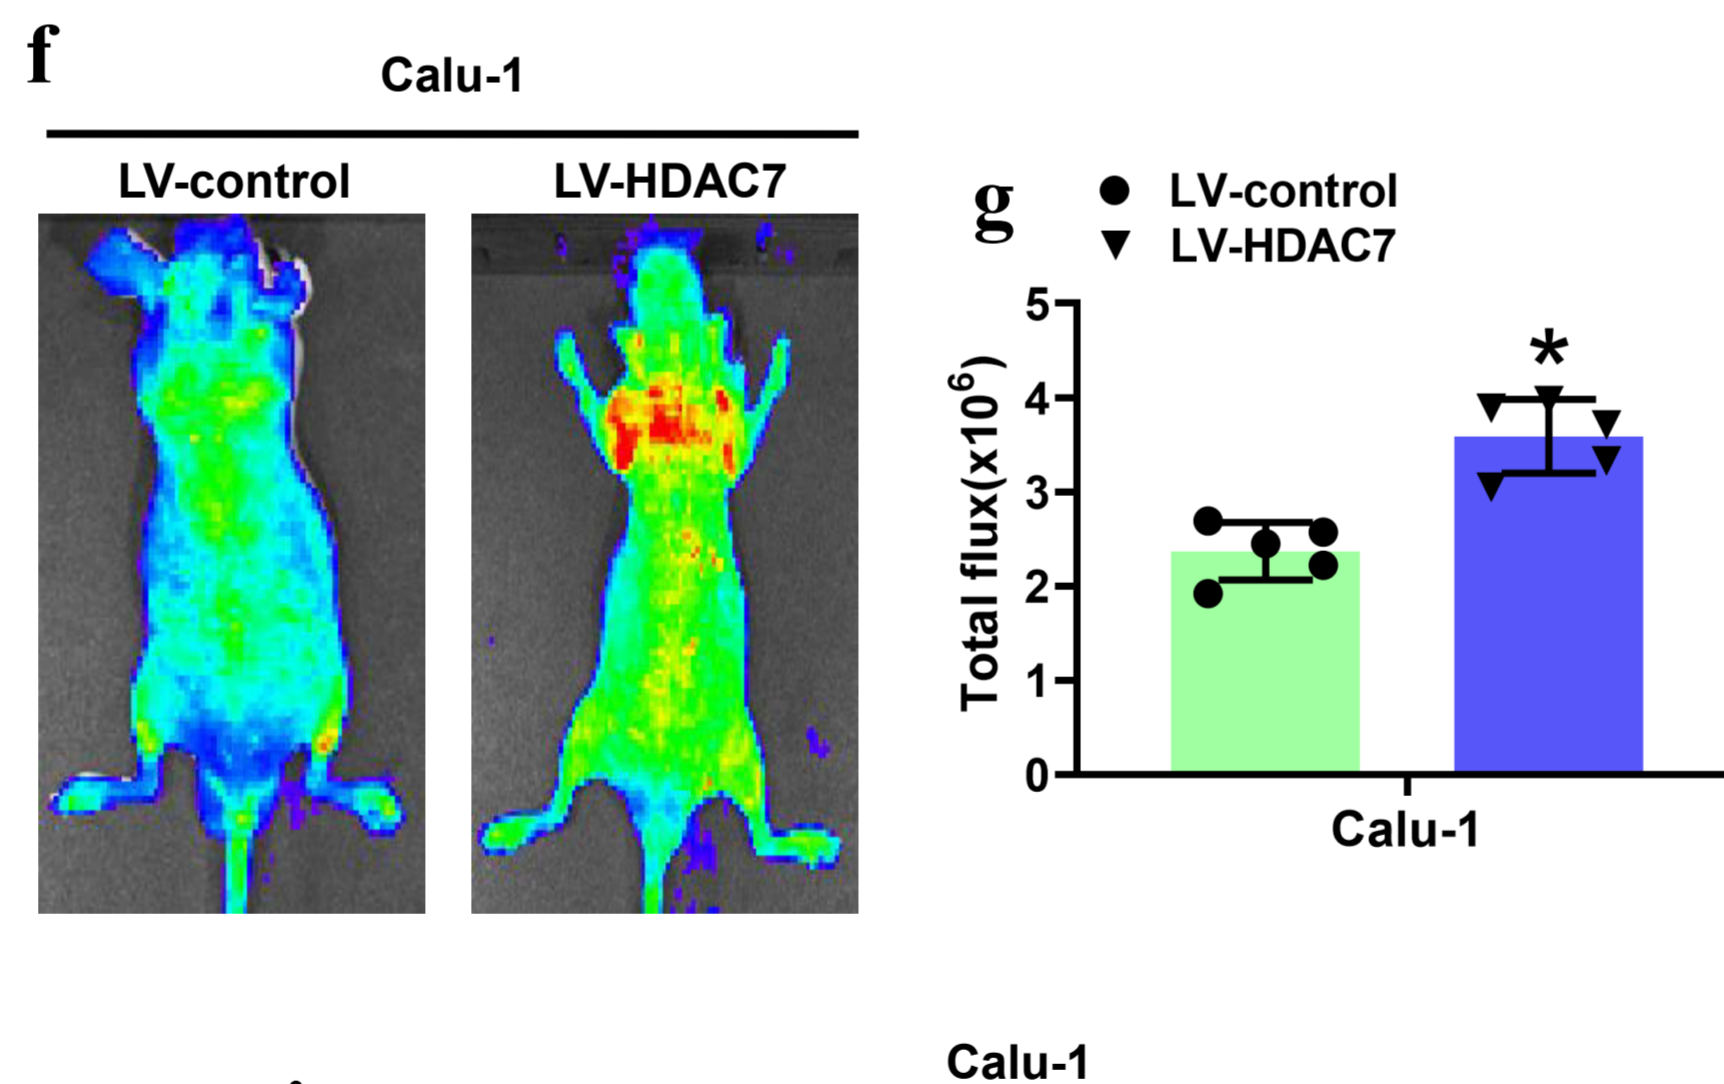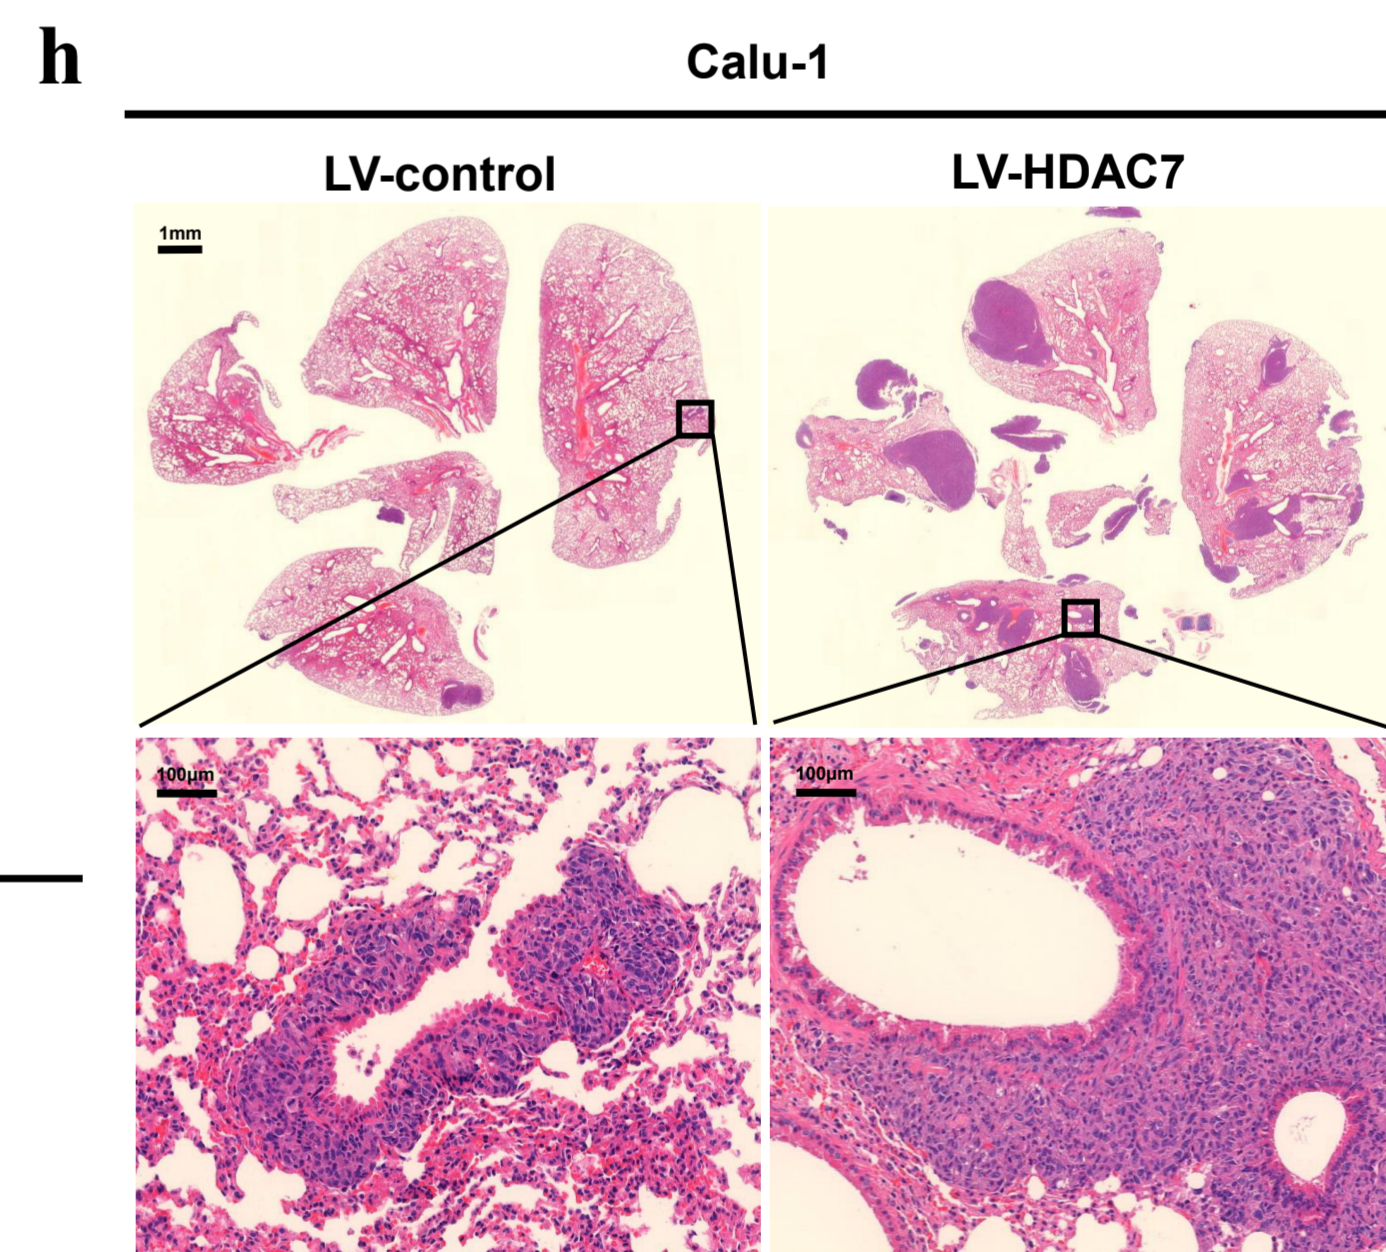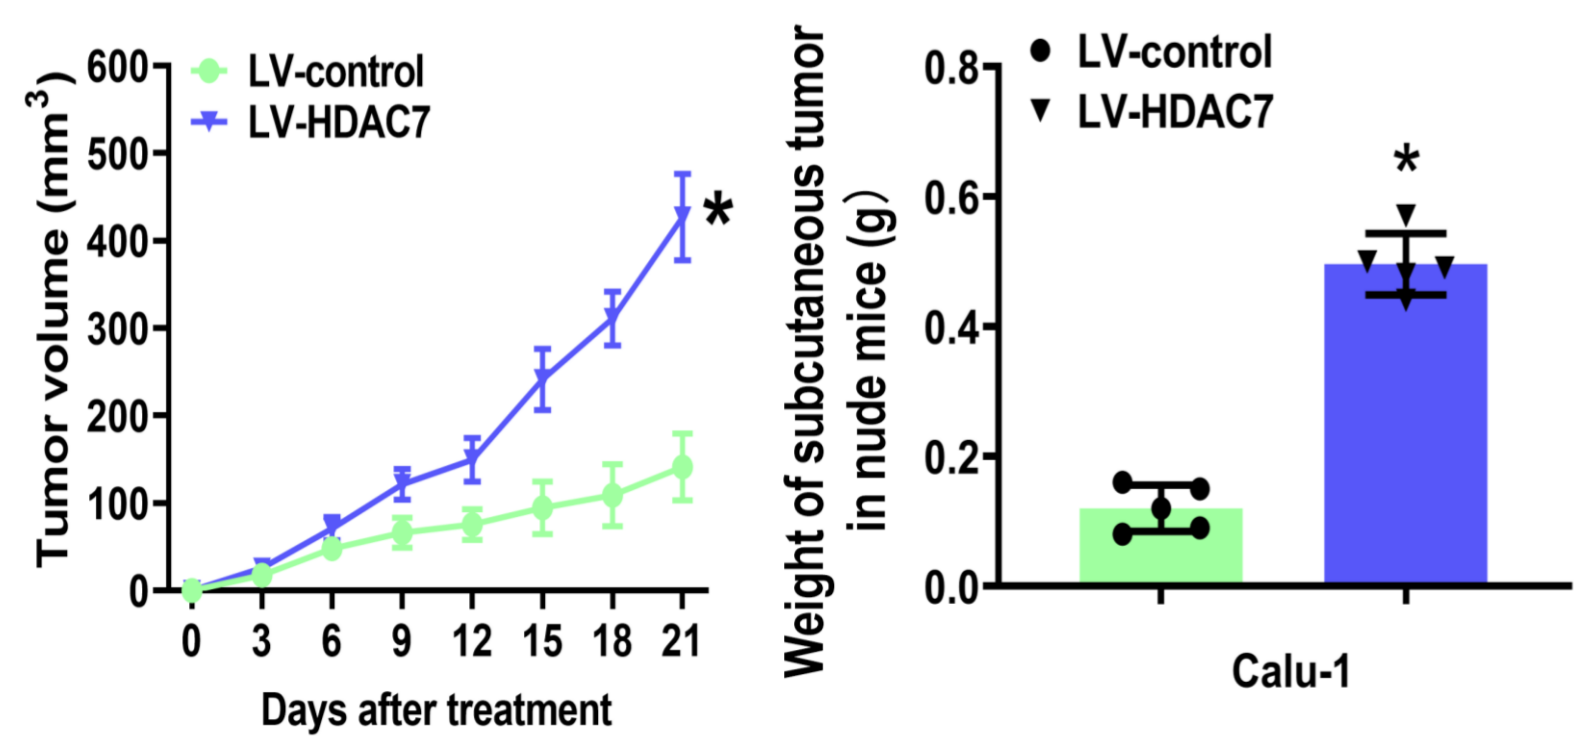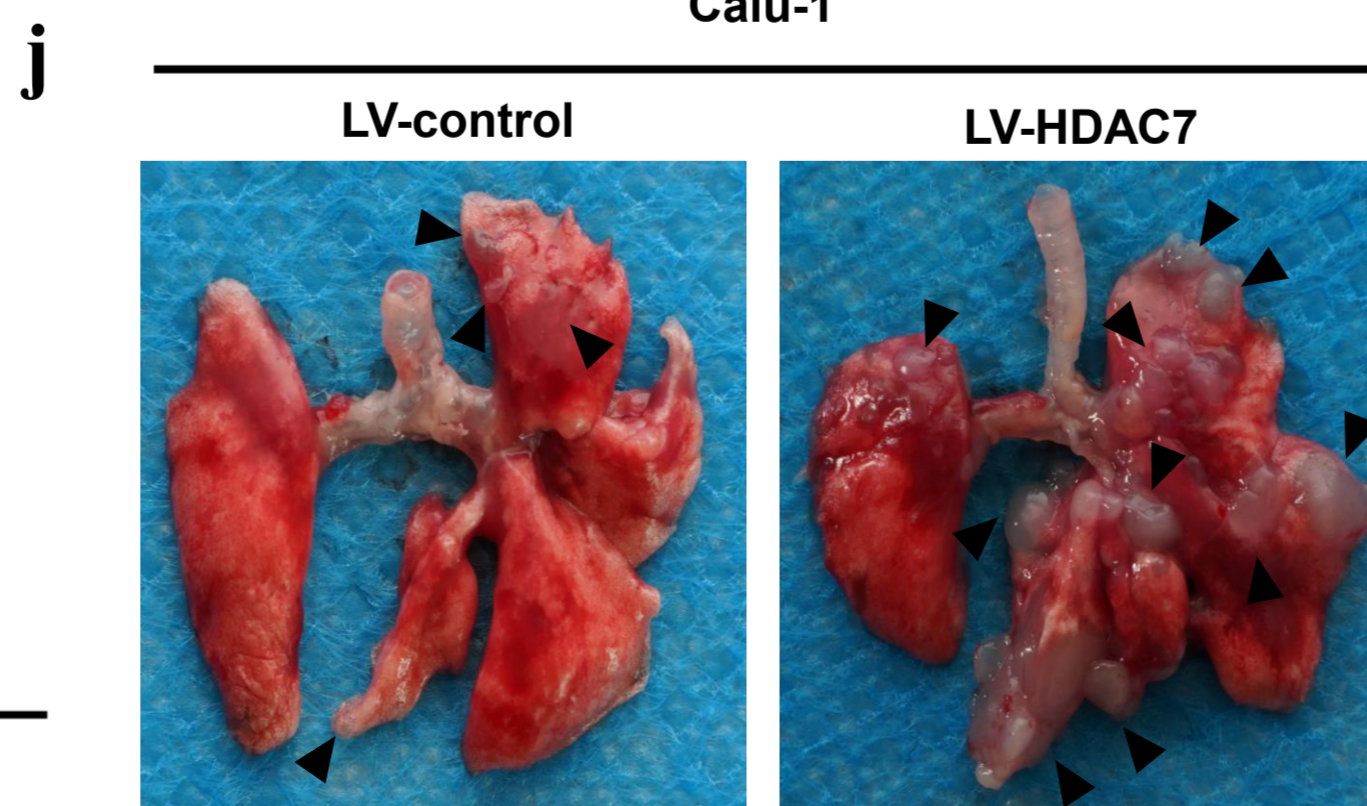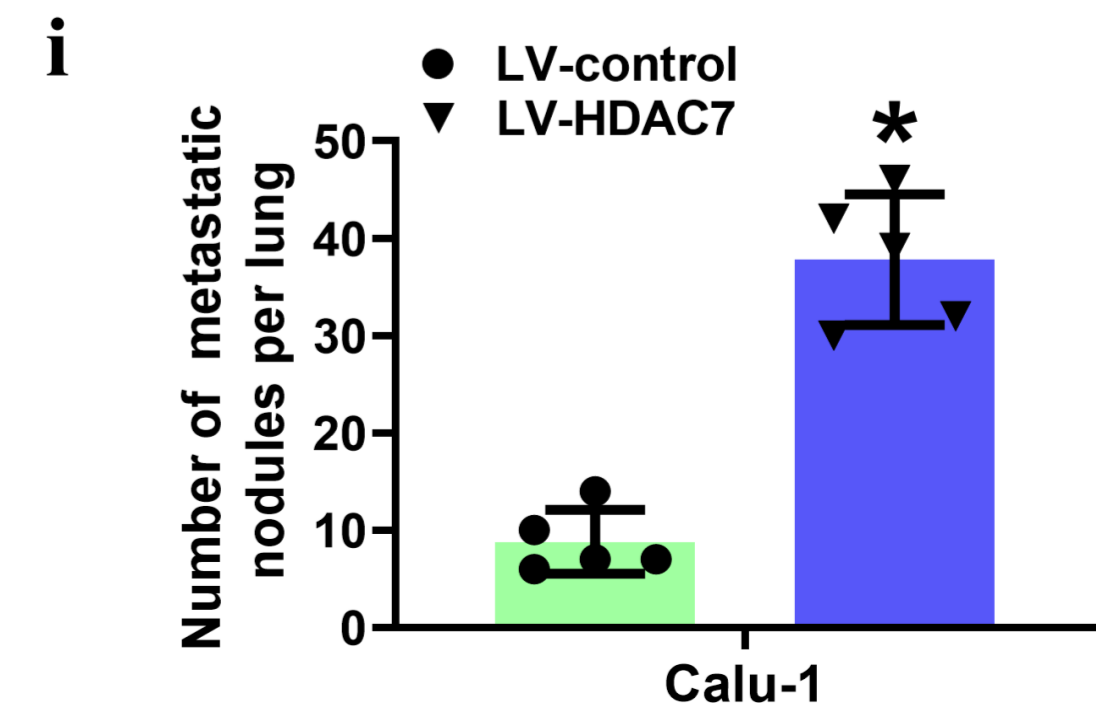

Supplement: 13046_2022_2266_MOESM1_ESM.pdf [file 13046_2022_2266_MOESM1_ESM.pdf]
