# Supplementary material for: HDAC7 promotes NSCLC proliferation and metastasis via stabilization by deubiquitinase USP10 and activation of β-catenin-FGF18 pathway
Source: PubMed Central journal article supplement (PMC8915541; doi:10.1186/s13046-022-02266-9), 2022-03-11
Supplement: 13046_2022_2266_MOESM3_ESM.pdf [file 13046_2022_2266_MOESM3_ESM.pdf]

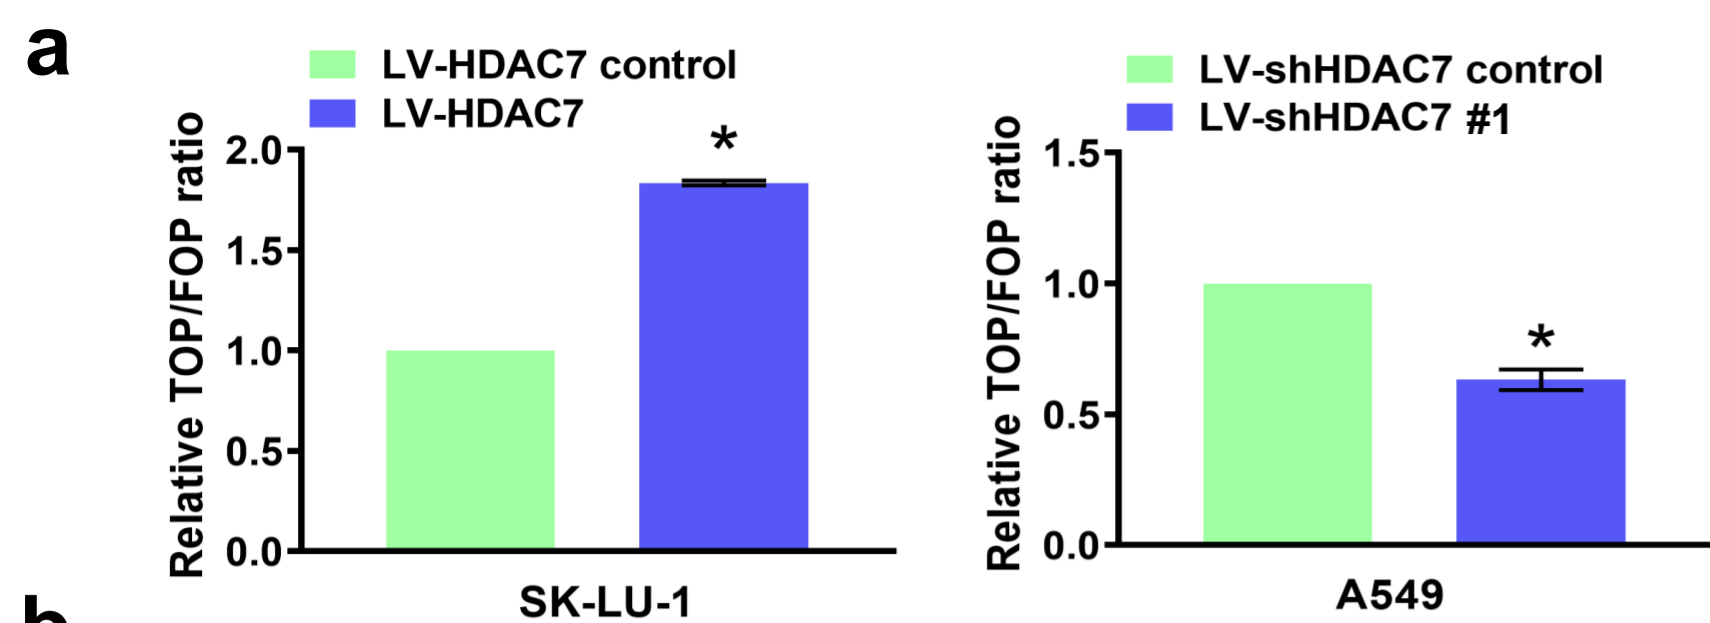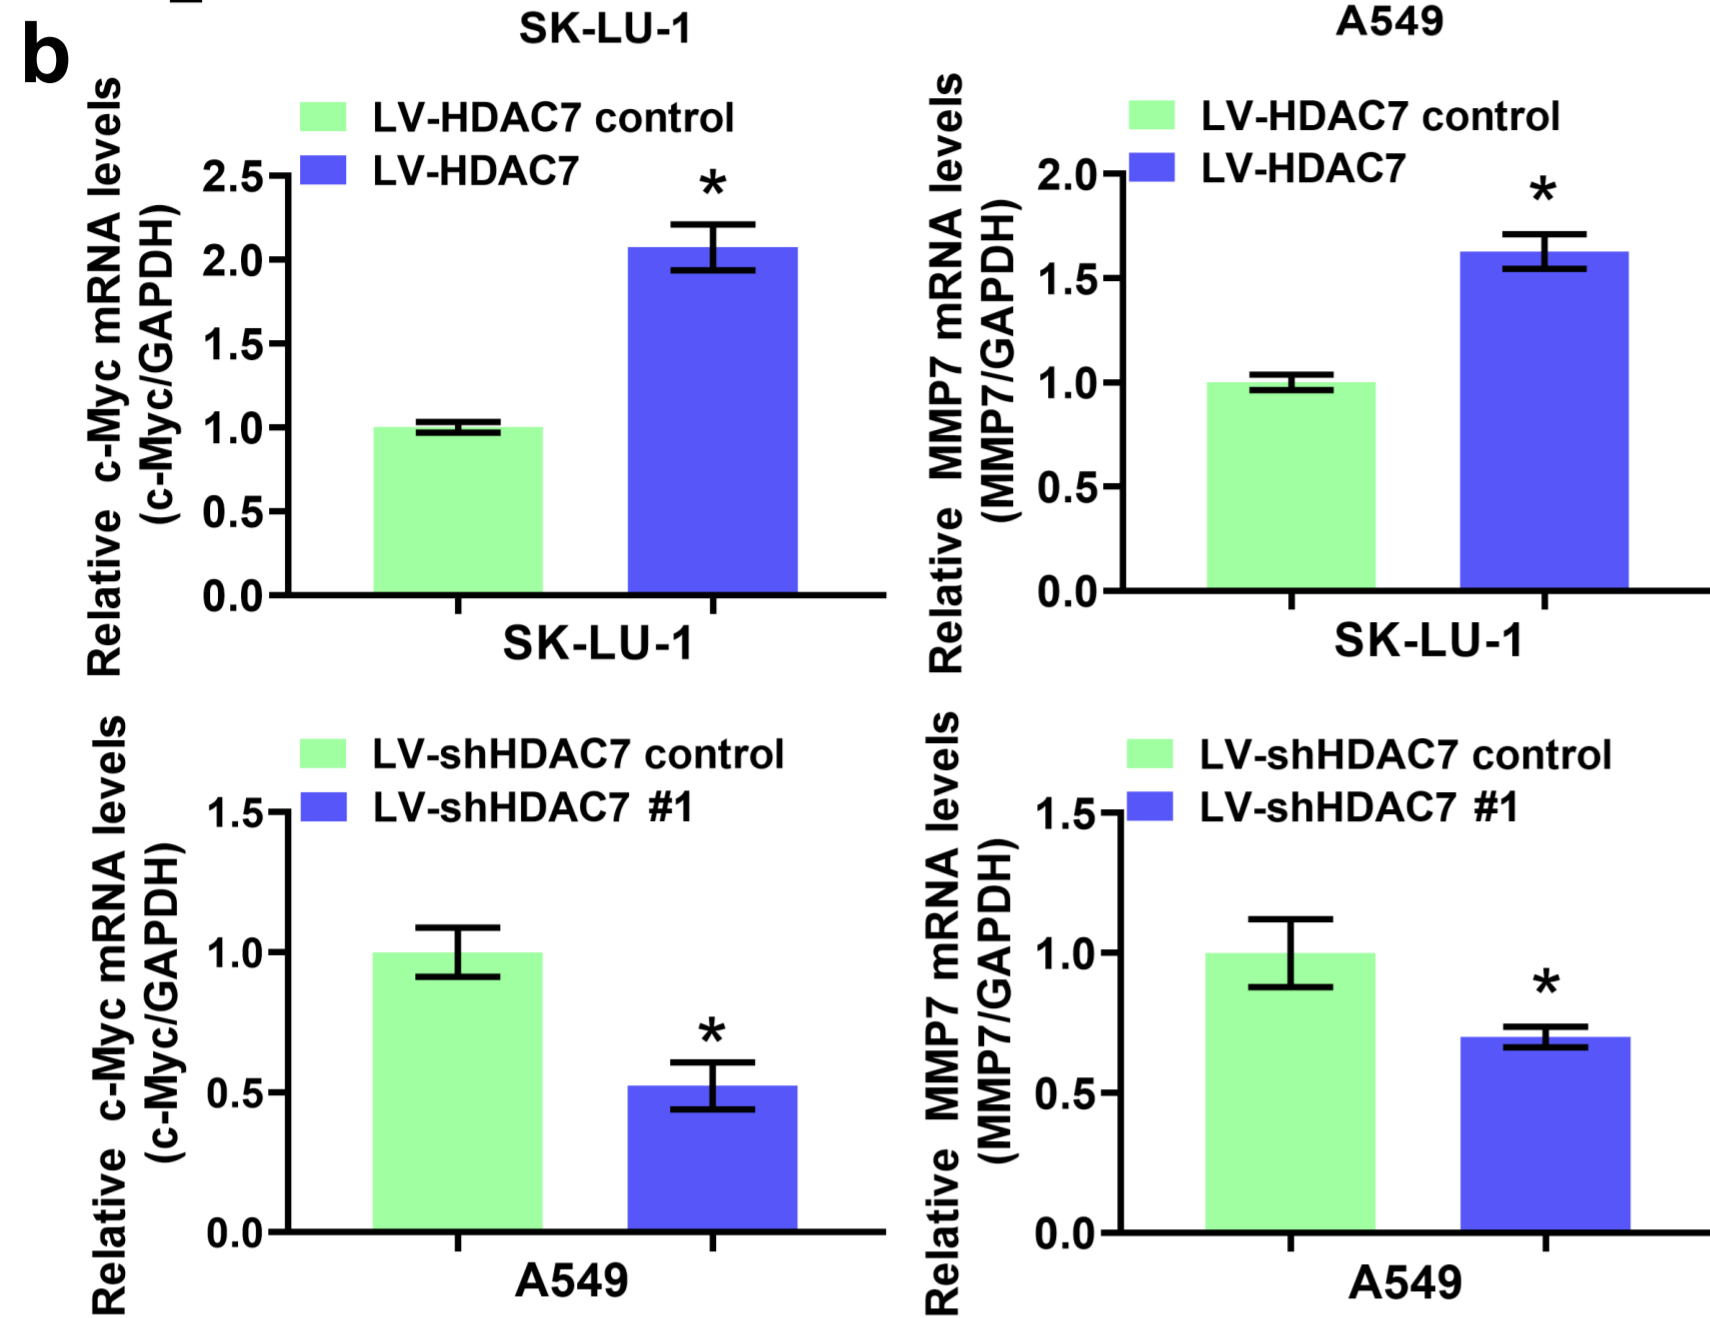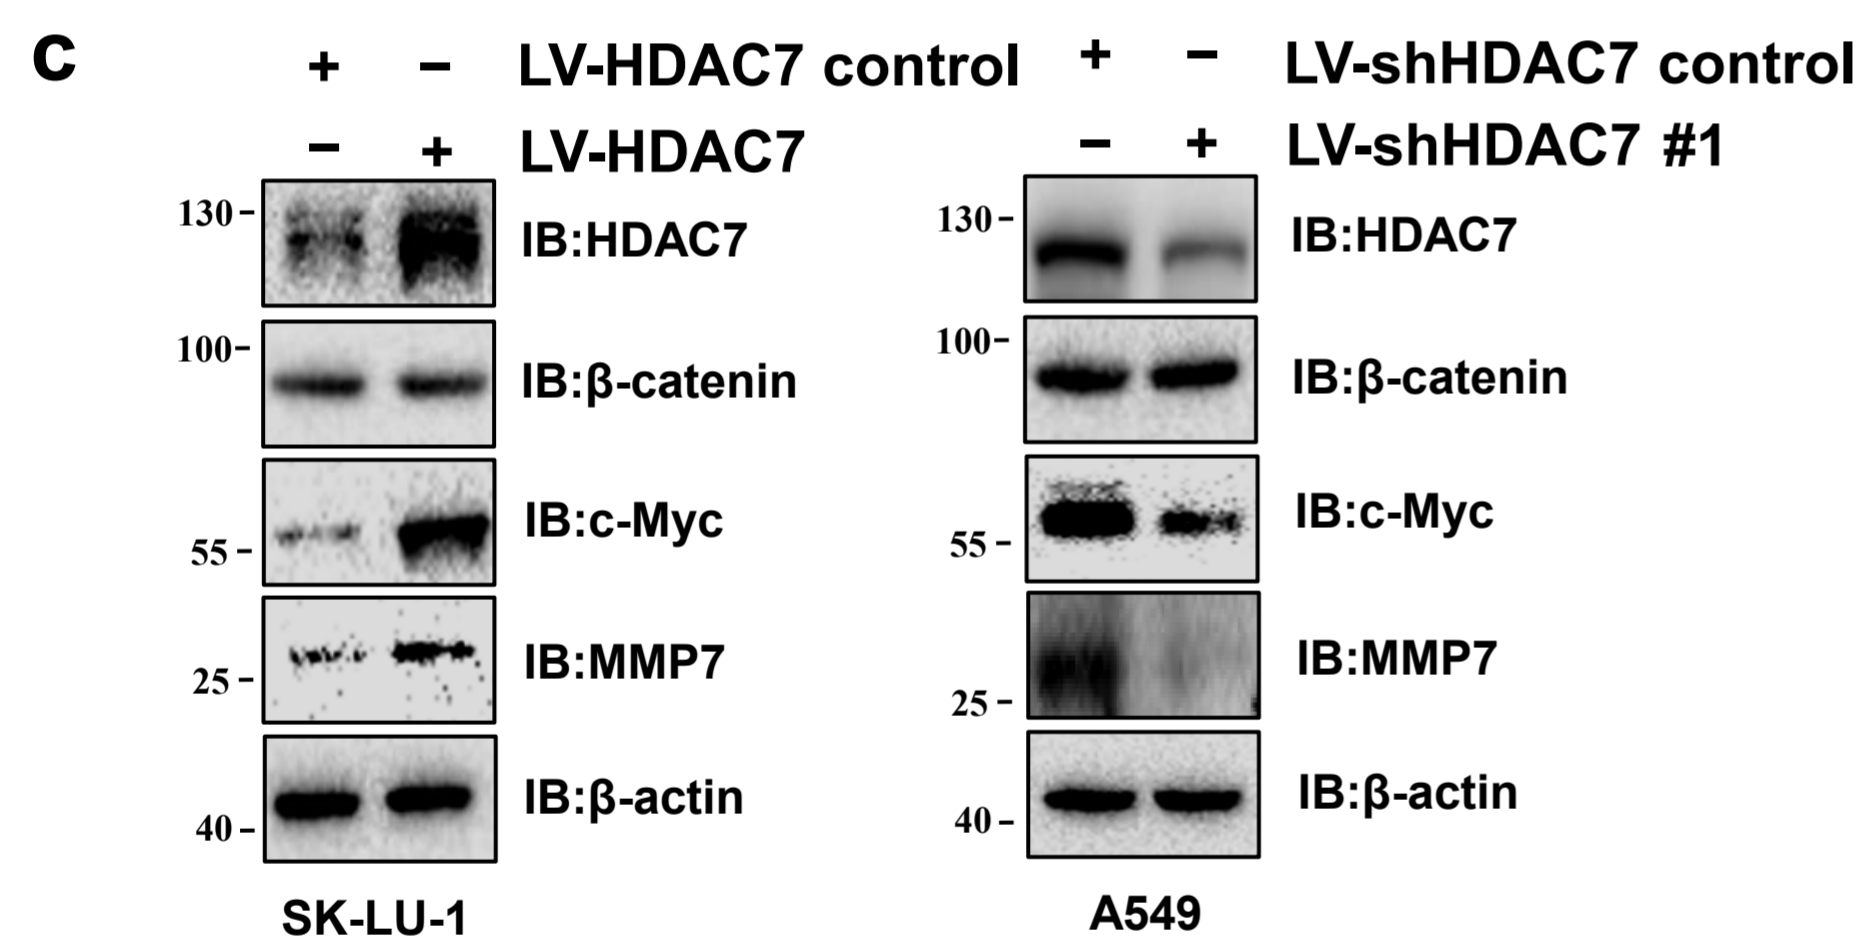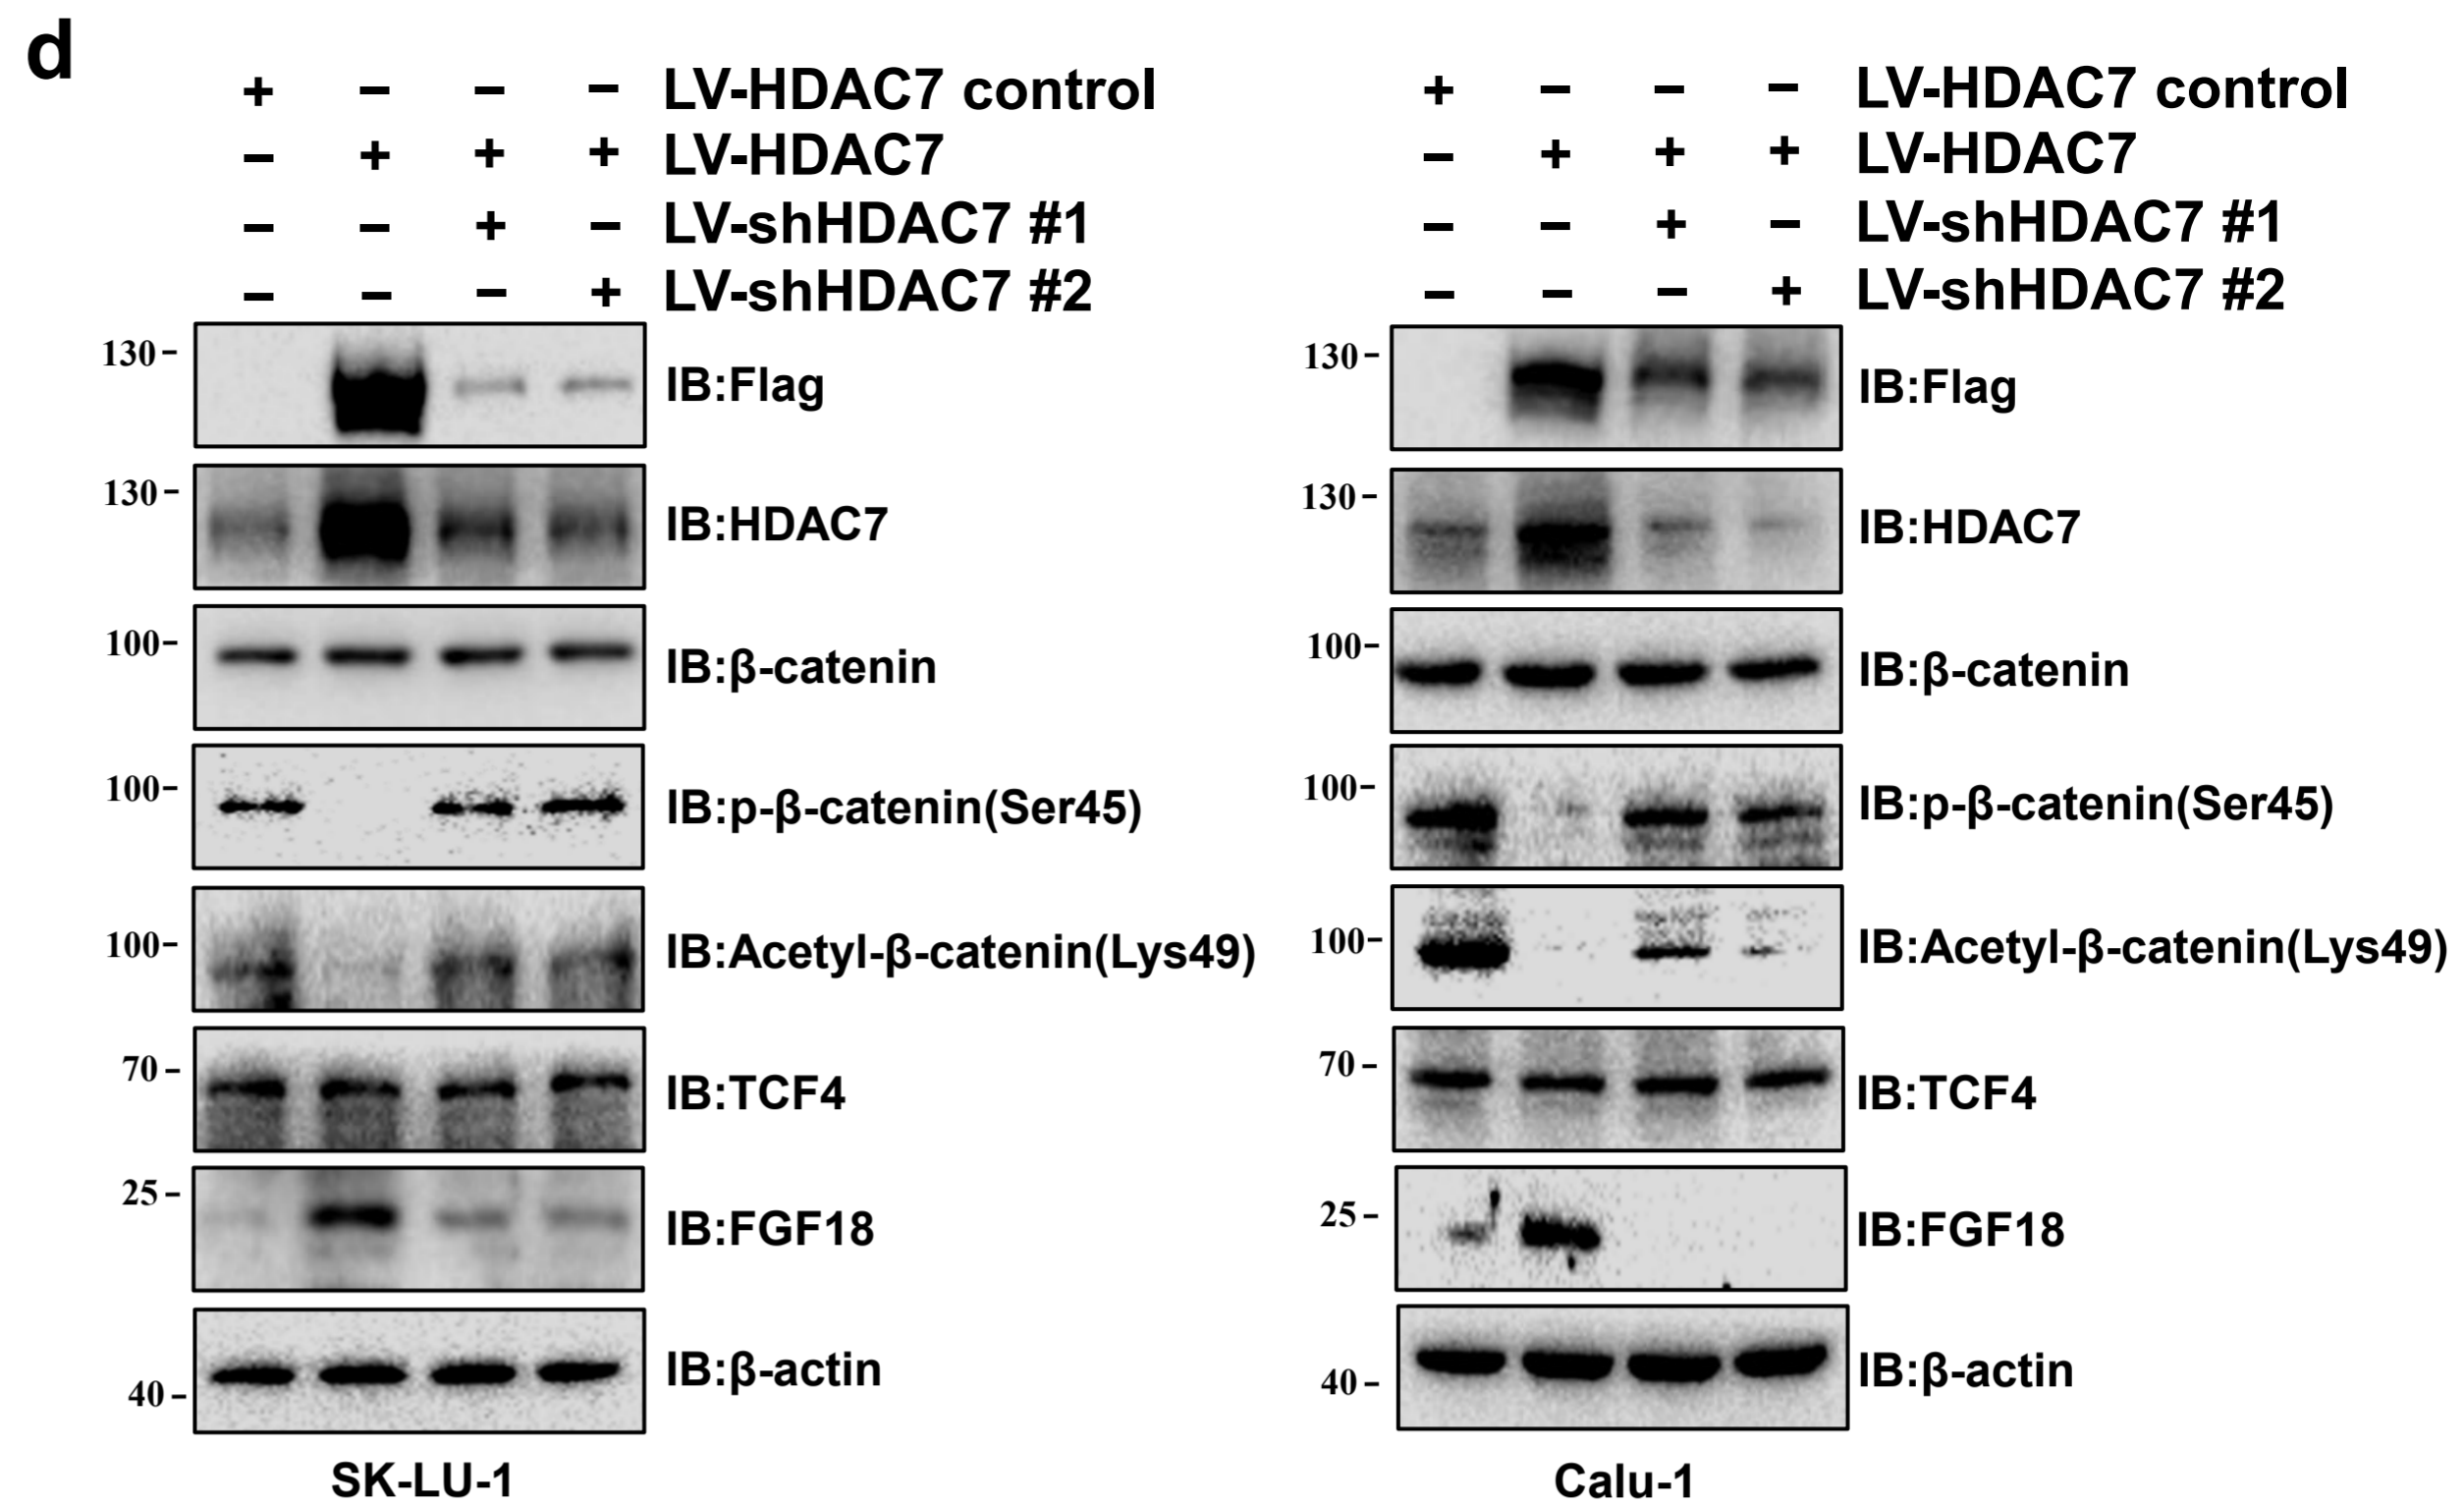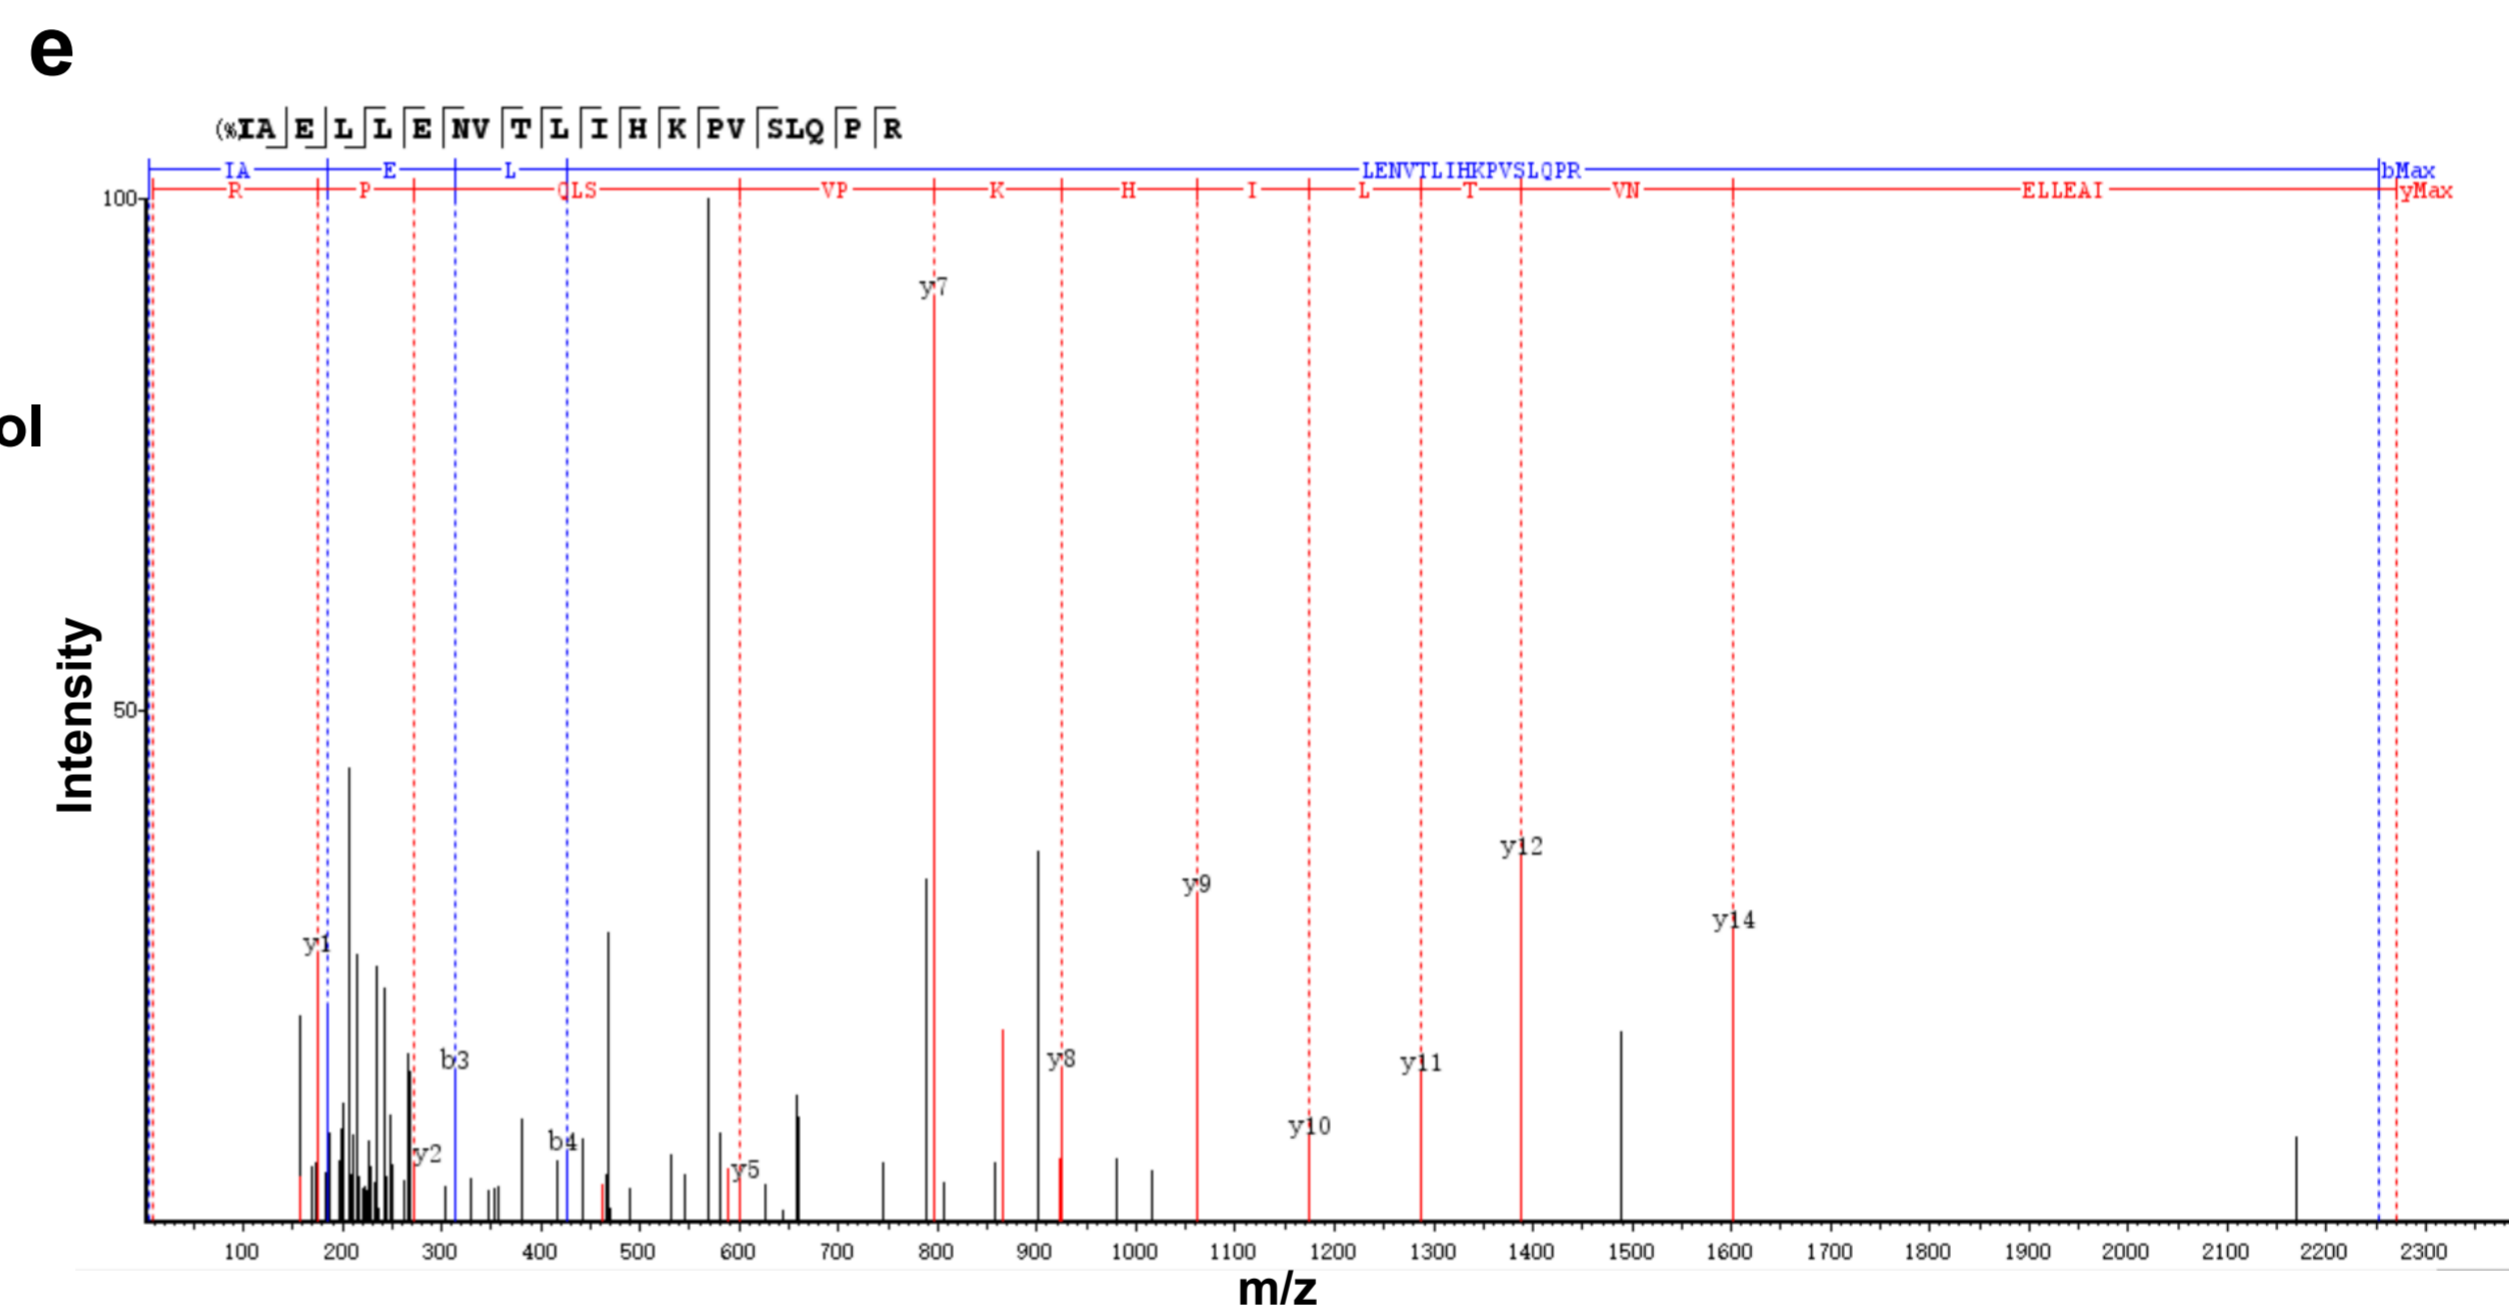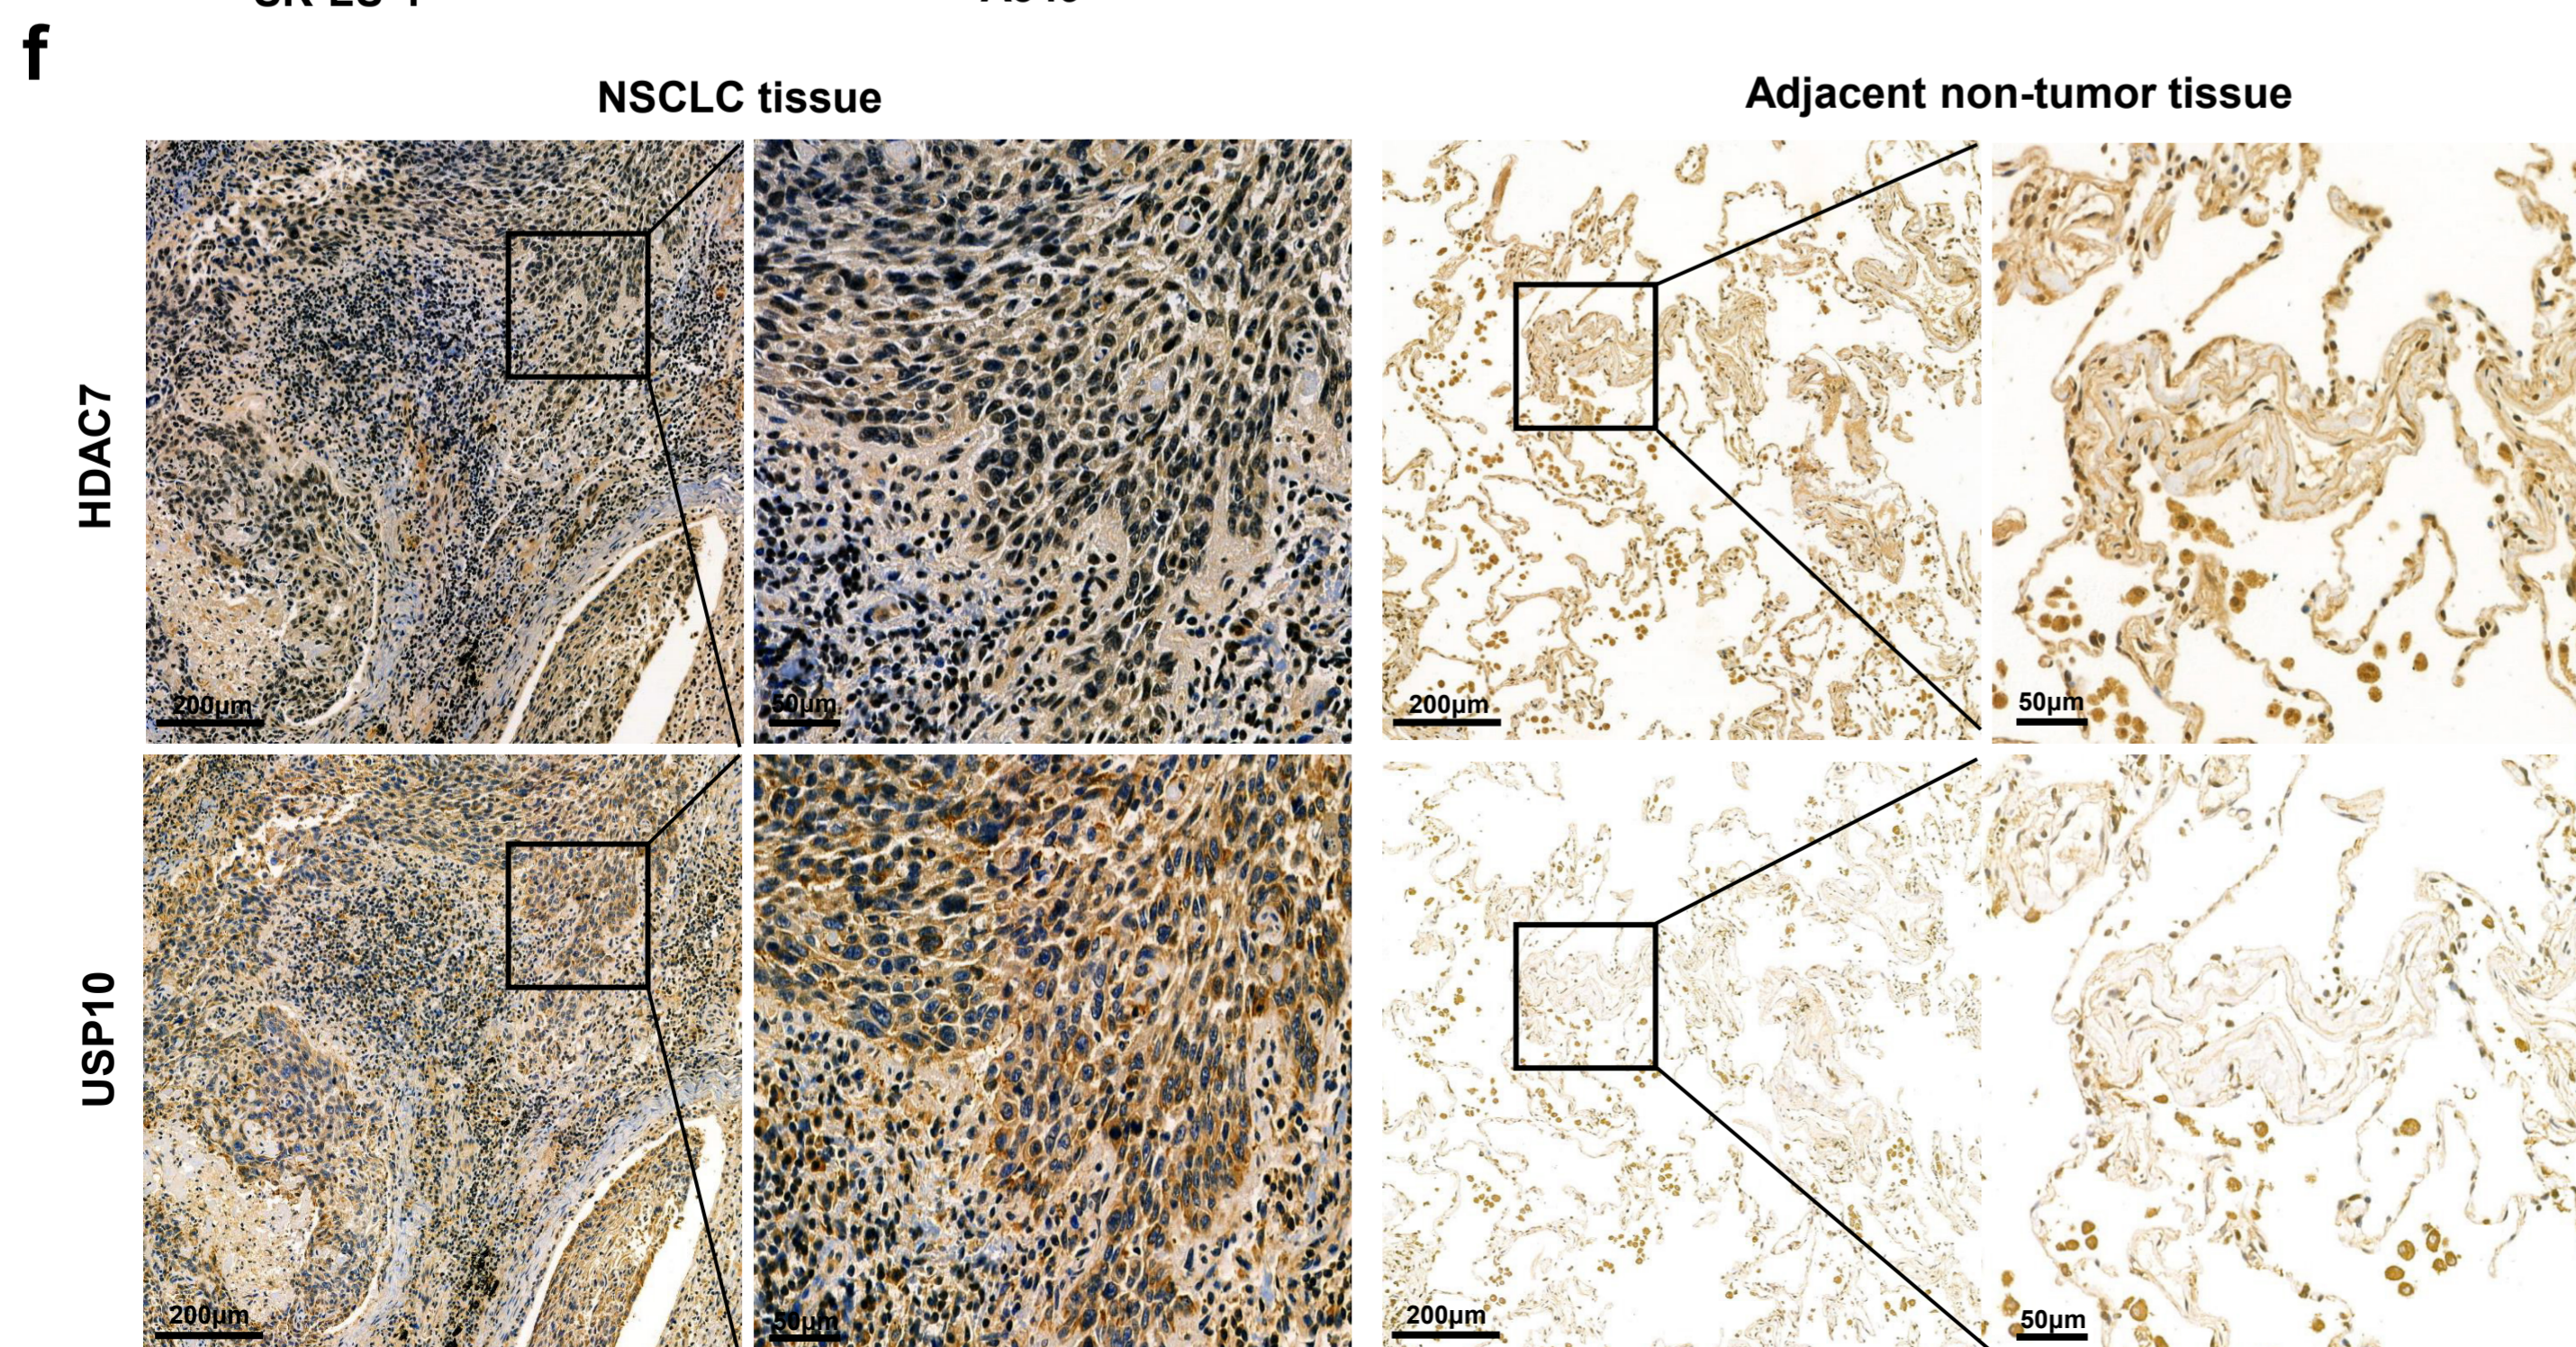

**g**

Correlation analysis of HDAC7 and USP10 Expression in NSCLC tissues (N=71)

|                   | USP10       |            | Correlation coefficient | p value |
|-------------------|-------------|------------|-------------------------|---------|
|                   | High (N=35) | Low (N=36) |                         |         |
| HDAC7 High (N=26) | 21          | 5          | 0.479                   | <0.001  |
| HDAC7 Low (N=45)  | 14          | 31         |                         |         |

**h**

Correlation analysis of HDAC7 and USP10 Expression in adjacent non-tumor tissues (N=71)

|                   | USP10       |            | Correlation coefficient | p value |
|-------------------|-------------|------------|-------------------------|---------|
|                   | High (N=30) | Low (N=41) |                         |         |
| HDAC7 High (N=14) | 4           | 10         | -0.137                  | 0.254   |
| HDAC7 Low (N=57)  | 26          | 31         |                         |         |
